# Supplementary material
Source: HighWire-hosted journal article supplement (https://bmjopen.bmj.com/content/14/8/e084686)
Supplement: inline-supplementary-material-2 [file inline-supplementary-material-2.pdf]

Supplementary material.

English translated version (translated solely as exemplification) of The Perceived Dietary Adherence Questionnaire – a Food Frequency Questionnaire. The Danish version (not exemplified) is used in the study.

The Perceived Dietary Adherence Questionnaire – a Food Frequency Questionnaire

What have you eaten the last seven days?

| Question                                                                                                                                                                                                                                | Circle number of days |
|-----------------------------------------------------------------------------------------------------------------------------------------------------------------------------------------------------------------------------------------|-----------------------|
| 1. For how many of the <b>LAST 7 DAYS</b> have you eaten plant-based? That is, foods with lots of vegetables, legumes, fruits, nuts, seeds, and whole grain products?                                                                   | 0 1 2 3 4 5 6 7       |
| 2. For how many of the <b>LAST 7 DAYS</b> have you eaten a varied diet? That is both fruits, vegetables, grain products, fish, dairy products, but also different vegetables and fruits, different grain products, different fish, etc. | 0 1 2 3 4 5 6 7       |
| 3. For how many of the <b>LAST 7 DAYS</b> have you paid attention when eating, and only eaten until you were full?                                                                                                                      | 0 1 2 3 4 5 6 7       |
| 4. For how many of the <b>LAST 7 DAYS</b> have you eaten a minimum of 600 grams of vegetables and fruits '6 a day'? (where the half is vegetables)                                                                                      | 0 1 2 3 4 5 6 7       |
| 5. For how many of the <b>LAST 7 DAYS</b> have you eaten fish and seafood?                                                                                                                                                              | 0 1 2 3 4 5 6 7       |
| 6. For how many of the <b>LAST 7 DAYS</b> have you eaten meat (from four-legged animals) or cold cuts (that were not keyhole marked / max. 10% fat)?                                                                                    | 0 1 2 3 4 5 6 7       |
| 7. For how many of the <b>LAST 7 DAYS</b> have you chosen whole grain varieties when eating bread, pasta, rice, crispbread, breakfast cereals, and porridge? E.g., products with the whole grain logo.                                  | 0 1 2 3 4 5 6 7       |
| 8. For how many of the <b>LAST 7 DAYS</b> have you chosen plant oils, such as rapeseed and olive oil, instead of hard fats, such as butter and coconut oil when cooking?                                                                | 0 1 2 3 4 5 6 7       |
| 9. For how many of the <b>LAST 7 DAYS</b> have you used butter on bread?                                                                                                                                                                | 0 1 2 3 4 5 6 7       |
| 10. For how many of the <b>LAST 7 DAYS</b> have you eaten lean dairy products, such as milk, cultured milk products, and cheese?                                                                                                        | 0 1 2 3 4 5 6 7       |
| 11. For how many of the <b>LAST 7 DAYS</b> have you eaten high-fat foods such as pizza, fries, burgers, biscuits, or chips?                                                                                                             | 0 1 2 3 4 5 6 7       |
| 12. For how many of the <b>LAST 7 DAYS</b> have you eaten sugary foods like cake, dinner rolls, cookies, dessert, candy, etc.?                                                                                                          | 0 1 2 3 4 5 6 7       |
| 13. For how many of the <b>LAST 7 DAYS</b> have you primarily drunk water when you were thirsty, with your meals, and when you were physically active?                                                                                  | 0 1 2 3 4 5 6 7       |
